# Supplementary material
Source: ML conference proceedings conference paper supplement (https://openaccess.thecvf.com/content/WACV2024/html/Limanta_CAMOT_Camera_Angle-Aware_WACV_2024_paper.html)
Supplement: Supplementary file 1 [file Limanta_CAMOT_Camera_Angle-Aware_WACV_2024_supplemental.zip]

| $f$ (mm) | MOTA $\uparrow$ | IDF1 $\uparrow$ |
|----------|-----------------|-----------------|
| 20       | 75.2            | 78.1            |
| 35       | 77.6            | 80.1            |
| 50       | <b>78.4</b>     | <b>81.2</b>     |
| 75       | 75.2            | 79.4            |
| 100      | 74.2            | 77.8            |
| 200      | 73.4            | 75.2            |
| 300      | 71.9            | 74.5            |

Table 1. Results of different  $f$  values on the MOT17 validation set.

## A. Focal Length

As the MOT benchmarks do not provide the camera intrinsic matrix, the focal length  $f$  for each video sequence is unknown. We have tried several common (35mm equivalent) focal lengths [1] for values used from wide-angle lenses (20mm) to telephoto lenses ( $> 100\text{mm}$ ). The results are shown in Table 1.

## References

- [1] L.D. StroebeI. *View Camera Technique*. Focal Press, 1999. 1
