# Supplementary material
Source: ML conference proceedings conference paper supplement (https://openaccess.thecvf.com/content/WACV2024/html/Limanta_CAMOT_Camera_Angle-Aware_WACV_2024_paper.html)
Supplement: Supplementary file 2 [file Limanta_CAMOT_Camera_Angle-Aware_WACV_2024_supplemental.zip]

Archive with 1 entries (1 files):
- appendix.pdf
